# Supplementary material for: Validation of an HPLC Method for the Simultaneous Quantification of Metabolic Reaction Products Catalysed by CYP2C11 Enzymes in Rat Liver Microsomes: In Vitro Inhibitory Effect of Salicylic Acid on CYP2C11 Enzyme
Source: Molecules. 2019 Nov 25;24(23):4294. doi: 10.3390/molecules24234294 (PMC6930622; doi:10.3390/molecules24234294)
Supplement: Supplementary file 1 [file molecules-24-04294-s001.pdf]

## Supplementary Materials:

### 1. UV-VIS Spectroscopy:

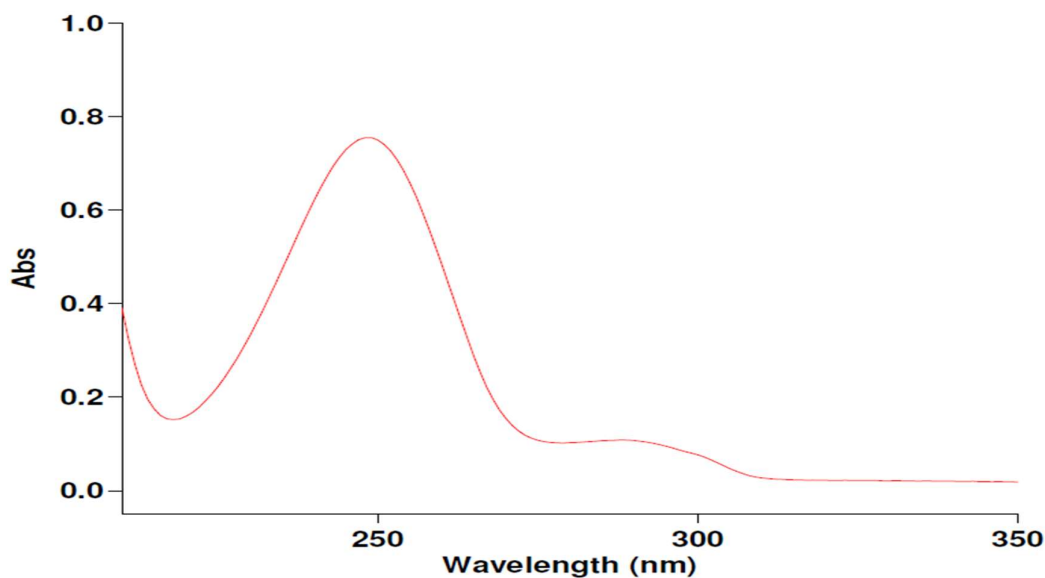

Figure 1. UV-VIS spectroscopy for Phenacetin (internal standard) in the CYP2C11 assay.

### 2. CYP2C11 control study incubation:

Different concentrations of testosterone (400, 300, 200, 150, 100, 50 and 25 $\mu$ M) were used in CYP2C11 incubation mixture at 60 mins of incubation time using 1.0mM NADPH, 5.0mM G6P, 1.7units/ml G6PDH, 1.0mM EDTA and 3.0mM Magnesium chloride.

**Table 1** shows the regression analysis on calibration curves and limit of detection (n=3) for both Testosterone (CYP2C11 substrate) and 16-alfa hydroxytestosterone (CYP2C11 metabolite) for the CYP2C11 assay incubation.

**Table 1.** Linear regression, range and limit of detection analysis for CYP2C11 assay incubation.

| Components                       | Regression equation<br>( $y=ax+b$ ) <sup>a</sup> | R <sup>2</sup> | Linear range<br>( $\mu$ M) | LOD ( $\mu$ M) |
|----------------------------------|--------------------------------------------------|----------------|----------------------------|----------------|
| Testosterone                     | $y=0.0218x+0.0709$                               | 0.9993         | 25 - 500                   | 8.5972         |
| 16 $\alpha$ -hydroxytestosterone | $y=0.0204x-0.0036$                               | 0.9998         | 10 - 100                   | 1.3501         |

<sup>a</sup>: x is the concentration of the compound in the reaction mixture ( $\mu\text{M}$ ), y is the peak area ratio of the Standard over the peak area of the internal Standard (Phenacetin  $50\mu\text{M}$ ), a is the slope and b is the y-intercept of the linear regression.

The regression line for Testosterone substrate ( $R^2=0.9993$ ) in **Table 1** demonstrates a linear range of 25-  $500\mu\text{M}$ . The regression line for 16-alfa hydroxytestosterone metabolite ( $R^2=0.9998$ ) in **Table 1** demonstrates a linear range of 10-  $100\mu\text{M}$ .

**Table 2** illustrates the concentrations of testosterone (CYP2C11 substrate) before and after the incubation and the concentration of 16-alfa hydroxytestosterone formed after the incubation in a rat microsomal incubation assay (n=3).

**Table 2.** Outcomes of rat microsomal incubation assays (n=3) of 60 mins incubation using different range of Testosterone concentration levels.

| Probe substrate | Amount before incubation ( $\mu\text{M}$ ) | Amount after incubation ( $\mu\text{M}$ ) | Metabolite                       | Amount after incubation ( $\mu\text{M}$ ) |
|-----------------|--------------------------------------------|-------------------------------------------|----------------------------------|-------------------------------------------|
| Testosterone    | 400                                        | 154.4205                                  | 16 $\alpha$ -hydroxytestosterone | 20.1935                                   |
|                 | 300                                        | 62.1746                                   |                                  | 18.3260                                   |
|                 | 200                                        | 7.2340                                    |                                  | 35.0633                                   |
|                 | 150                                        | 11.6789                                   |                                  | 20.3076                                   |
|                 | 100                                        | 51.9314                                   |                                  | 6.4318                                    |
|                 | 50                                         | 10.1987                                   |                                  | 4.4544                                    |
|                 | 25                                         | 0.5934                                    |                                  | 1.7575                                    |

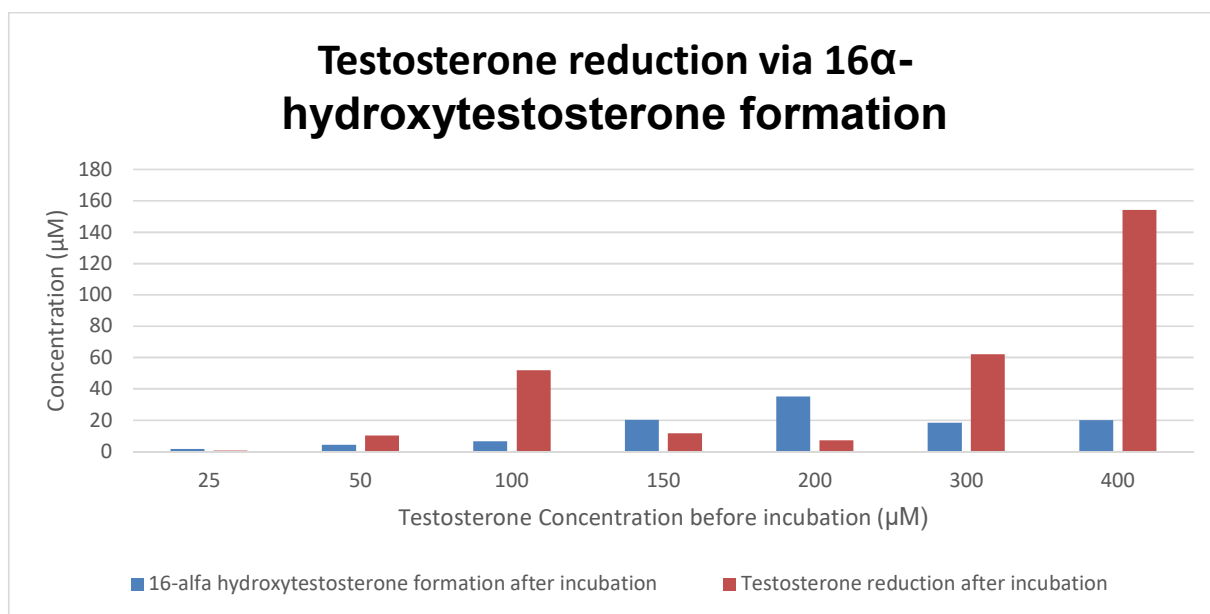

**Figure 2.** Bar chart shows the reduction in Testosterone and the formation of 16-alfa hydroxytestosterone after 60 mins of CYP2C11 assay incubation at different testosterone concentration levels (25, 50, 100, 150, 200, 300 and 400μM).

**Table 2** and **Figure 2**, revealed that testosterone at concentration of 200μM (before incubation) metabolized to 16α-hydroxytestosterone at its maximum amount (35.0633μM) compared to other different testosterone concentrations level (400, 300, 150, 100, 50 and 25μM). Apparently, at 200μM testosterone concentration, a massive decrease in its amount was observed (from 200μM to 7.2340μM) after incubation which probably formed 16α-hydroxytestosterone at its maximum amount. Thus, in this study, Salicylic acid at different concentrations (200, 150, 100, 50 and 25μM) was incubated with testosterone at different concentrations stated (200, 150, 100, 50 and 25μM) (Yamazaki et al., 1996). Thus, testosterone at concentrations of 300 and 400μM do not necessarily need to be studied because testosterone at a concentration of 200μM formed 16α-hydroxytestosterone at its maximum amount (35.0633μM) compared to the 300 and 400μM concentrations of testosterone (18.3260 and 20.1935μM) respectively.
